# Supplementary material
Source: publisher site journal article supplement (https://www.degruyterbrill.com/publication/isbn/9783110314038/downloadAsset/9783110314038_Inhaltsverzeichnis.pdf)
Supplement: Supplementary file 1 [file 9783110314038_Inhaltsverzeichnis.pdf]

# Inhalt

## **I Einleitung — 1**

- 1 Nullstunden — 1
- 2 Material und Aufbau — 8

## **II Das Imaginäre und das Image — 15**

- 1 Einleitung — 15
- 2 Imagination und Einbildungskraft:  
Das Vermögen des Subjekts — 20
- 3 Die imaginäre Tätigkeit — 22
- 4 Subjektivierung als Handlung. Austragungsort:  
Spiegel-Stadion — 23
  - 4.1 Das Imaginäre, das Symbolische und das Reale — 27
  - 5 Das Reale des Imaginären — 29
    - 5.1 Die imaginäre Funktion des Phantasmas — 33
    - 5.2 Soziales Phantasma — 35
    - 5.3 Soziales Phantasma und das nationale Imaginäre — 38
  - 6 Zwischenstand: Das Imaginäre als Dynamik  
der Identifizierung und das Image — 41
  - 7 Image — 43
    - 7.1 Image, Stereotypie und Pseudo-Ideal — 44
    - 7.2 Die reflexive Struktur des Images — 47
    - 7.3 Strategien der Naturalisierung — 50
  - 8 Zusammenführung und Ausblick — 51

## **III Wir sind wieder wer — 53**

- 1 Nationale Kinoereignisse — 53
- 2 Dokumentarische Anliegen, fiktionale Erzählungen — 56
- 3 Sönke Wortmann, *Das Wunder von Bern* — 60
  - 3.1 Schauplatz Deutschland? ‚Reale‘ Räume,  
Projektionsräume — 60
  - 3.2 Grenzüberschreitung: Ganz Deutschland — 63
- 4 Sönke Wortmann, *Deutschland. Ein Sommermärchen* — 66
  - 4.1 Mittendrin: Kamerablick — 66
  - 4.2 Im Bett mit Torsten Frings — 69
  - 4.3 Schulterchluss: Gemeinschaft-Werden — 70
  - 4.4 Das Ganze repräsentieren — 73
  - 4.5 82 Millionen — 75

- 5            Wirtschaftswunder — **77**
- 5.1        Nation Branding — **84**
- 6            Wirtschaftswundermärchen — **87**

**IV        Wende-Roman — 89**

- 1            Redewendungen — **89**
- 2            Ingo Schulze, *Neue Leben* — **94**
- 2.1        Wenderückblende — **94**
- 2.2        Herausgeberfiktion und Autobiografisches — **98**
- 2.3        Fußnoten, die Geschichte machen — **101**
- 2.4        Briefroman — **103**
- 2.5        Liebesbriefe und Briefroman im Briefroman — **109**
- 2.6        Briefedition, Briefbiografie — **113**
- 2.7        Von der ‚Wende‘ erzählen — **115**
- 2.8        Faustische Wendungen — **120**
- 3            Literaturwenden — **124**

**V        Nostalgie — 127**

- 1            Ostalgie. Und was Nostalgie mit Nationalismus zu tun  
              hat — **127**
- 2            Wolfgang Becker, *Good Bye, Lenin!* — **133**
- 2.1        Geschichte wird gemacht – Die ‚DDR‘ auch — **133**
- 2.2        Du bist DDR — **135**
- 2.2.1     Konsumgemeinschaften — **137**
- 2.2.2     Sehgemeinschaften — **140**
- 2.3        Familienbilder — **143**
- 2.3.1     Nostalgischer Ödipus — **143**
- 2.3.2     Familienaufstellung — **145**
- 2.3.3     Raketen, Gurken, Vater Staat entmannt — **148**
- 3            Image Ostalgie und die Nostalgie des Imaginären — **152**

**VI        Deutschlandreisen — 155**

- 1            Konjunktur der Deutschlandreisen — **155**
- 2            *Die Topik des Imaginären* — **160**
- 3            Narrative Kartografie – Wolfgang Büscher,  
              *Deutschland, eine Reise* — **163**
- 3.1        Grenzerfahrung — **163**
- 3.2        Deutschland ganz: Eintauchen, Eindringen — **169**
- 4            Mental mapping – Roger Willemsen, *Deutschlandreise* — **172**
- 4.1        Der Augenzeuge lügt — **172**
- 4.2        Deutschland gibt es nicht — **174**

|             |                                                                       |
|-------------|-----------------------------------------------------------------------|
| 5           | In Deutschland nichts Neues — 180                                     |
| 6           | Die räumliche Dimension des Imaginären — 184                          |
| <b>VII</b>  | <b>Die Berliner Republik und Preußen — 187</b>                        |
| 1           | Neues Deutschland und preußisches Erbe — 187                          |
| 2           | Daniel Kehlmann, <i>Die Vermessung der Welt</i> — 191                 |
| 2.1         | Rahmenerzählung Nationaldiskurs — 193                                 |
| 2.2         | Bildungsbürgerbilder — 197                                            |
| 2.2.1       | Erziehung zum Deutschsein — 200                                       |
| 2.2.2       | Bildung nach Goethes Bilde — 202                                      |
| 2.2.3       | Zucht und Ordnung, Kauzigkeit und Genialität — 204                    |
| 2.3         | Raum und Nation: Weltvermessung und die<br>Erfindung der Nation — 205 |
| 3           | Die Berliner Stadtschloss-Debatte — 210                               |
| 3.1         | Stadt ohne Mitte — 210                                                |
| 3.2         | Mitte: Palast der Republik – Stadtschloss — 212                       |
| 3.3         | Das leere Zentrum — 216                                               |
| 3.4         | Schloss-Simulationen: Leere Kulissen, Stadt-Bild — 218                |
| 3.5         | Innen — 221                                                           |
| 4           | Preußische Selbstbilder — 224                                         |
| <b>VIII</b> | <b>Heimsuchung — 225</b>                                              |
| 1           | Wir Vergangenheitsbewältiger — 225                                    |
| 2           | Jenny Erpenbeck, <i>Heimsuchung</i> — 229                             |
| 2.1         | Kein Generationenroman — 229                                          |
| 2.2         | Ars memoriae: Gedächtnisfigur Haus — 232                              |
| 2.3         | Erinnerungsbilder — 234                                               |
| 2.3.1       | Abschließen — 235                                                     |
| 2.4         | Imagines agentes — 239                                                |
| 2.4.1       | Schwimmen — 242                                                       |
| 2.4.2       | Bäume — 244                                                           |
| 2.5         | Krypta — 246                                                          |
| 2.6         | Kehren – Gedächtnispflege, Erinnerungsarbeit — 252                    |
| 2.7         | Kultivieren – Literatur und Erinnerungskultur — 255                   |
| 3           | Imaginäre Erinnerungsgemeinschaften — 259                             |
| <b>IX</b>   | <b>Schluss — 261</b>                                                  |
|             | <b>Literatur- und Medienverzeichnis — 265</b>                         |
|             | <b>Siglen — 287</b>                                                   |
